# 1 Collateral sensitivity interactions between 2 antibiotics depend on local abiotic 3 conditions

4  
5 Richard C. Allen<sup>1</sup>, Katia R. Pfrunder-Cardozo<sup>1</sup>, Alex R. Hall<sup>1</sup>

6 1: Department of Environmental Systems Science, ETH Zürich, Zürich, Switzerland

## 7 8 Abstract

9  
10 Mutations conferring resistance to one antibiotic can increase (cross resistance) or  
11 decrease (collateral sensitivity) resistance to others. Drug combinations displaying  
12 collateral sensitivity could be used in treatments that slow resistance evolution.  
13 However, lab-to-clinic translation requires understanding whether collateral effects  
14 are robust across different environmental conditions. Here, we isolated and  
15 characterized resistant mutants of *Escherichia coli* using five antibiotics, before  
16 measuring collateral effects on resistance to other antibiotics. During both isolation  
17 and phenotyping, we varied conditions in ways relevant in nature (pH, temperature,  
18 bile). This revealed local abiotic conditions modified expression of resistance against  
19 both the antibiotic used during isolation and other antibiotics. Consequently, local  
20 conditions influenced collateral sensitivity in two ways: by favouring different sets  
21 of mutants (with different collateral sensitivities), and by modifying expression of  
22 collateral effects for individual mutants. These results place collateral sensitivity in  
23 the context of environmental variation, with important implications for translation  
24 to real-world applications.

## 25 Introduction

26

27 As a result of antibiotic use, resistance to antibiotics is increasing in bacterial  
28 populations<sup>1</sup>, necessitating efforts to identify new antibiotic types<sup>2</sup>. However, the  
29 time, money and risks involved in getting new therapeutics to the clinic<sup>3</sup>, and the  
30 targeting of many essential bacterial pathways by existing antibiotics mean that the  
31 rate of development for new antibiotics is outstripped by rates of resistance  
32 development<sup>3</sup>. To tackle the threat of antibiotic resistance, we must investigate  
33 strategies to slow the spread of resistance to existing treatments and to any new  
34 treatments in development<sup>4</sup>. One strategy that shows promise in slowing the  
35 evolution of resistance is to exploit collateral sensitivity interactions<sup>5-8</sup>. These have  
36 been observed for specific combinations of antibiotics where mutations conferring  
37 resistance to one antibiotic sensitise bacteria to a second antibiotic<sup>5-8</sup>, thereby  
38 increasing its effectiveness and reducing the potential for resistance evolution to  
39 the second antibiotic<sup>6,9</sup>. For collateral sensitivity interactions to be exploited  
40 therapeutically, it is important that their emergence across different populations of  
41 bacteria, such as those in different patients or in different communities, is  
42 repeatable. That is, unless collateral sensitivity interactions are predictable,  
43 exploiting them in new treatment strategies will be very challenging<sup>10-13</sup>.

44

45 Recent work revealed important genetic factors influencing the predictability of  
46 collateral sensitivity, but the importance of local abiotic conditions is still unclear.  
47 For example, high-throughput *in vitro* studies showed different replicate populations  
48 exposed to the same antibiotic sometimes acquire collateral sensitivity to another  
49 antibiotic, and sometimes do not<sup>10,11</sup>. This can be explained by different mutations,  
50 which vary in their phenotypic effects on resistance, spreading in different replicate  
51 populations<sup>11,12,14,15</sup>. However, we know from past work that phenotypic effects of  
52 antibiotic resistance mechanisms also vary strongly depending on local  
53 environmental conditions<sup>16-18</sup>. For example, bile can upregulate efflux pumps<sup>19</sup>, zinc  
54 can reduce the activity of aminoglycoside degrading enzymes<sup>20</sup>, and high  
55 temperature can modulate the effects of rifampicin-resistance mutations on growth  
56 in the absence of antibiotics<sup>21</sup>. This raises the possibility that local environmental  
57 conditions could influence both the emergence of collateral sensitivity (by affecting

58 which of the possible pathways to resistance are most strongly selected during  
59 antibiotic exposure) and its expression (by modifying the phenotypic effects of  
60 resistance alleles when bacteria are exposed to a second antibiotic). To date,  
61 research on collateral sensitivity interactions has focused on testing many  
62 combinations of antibiotics<sup>5,6,9,14</sup>, multiple strains<sup>10</sup>, or many replicate populations  
63 for individual antibiotic combinations<sup>11</sup>. Therefore, the role of local abiotic  
64 conditions in the emergence and expression of collateral sensitivity interactions  
65 remains unclear. Answering this question would improve our understanding of the  
66 robustness of collateral sensitivity across different populations and environments.  
67 This would in turn boost our ability to predict pathogen responses to treatment  
68 regimens that exploit collateral sensitivity interactions.

69  
70 To address these gaps in our knowledge, we tested for collateral effects (cross  
71 resistance or collateral sensitivity) between five pairs of drugs, each in four different  
72 experimental environments. Each drug pair consisted of a selection drug (which we  
73 used in mutant isolation) and a paired drug (which we used to test for collateral  
74 effects). We chose pairs of drugs indicated by past work to at least sometimes  
75 display collateral sensitivity interactions<sup>5,6</sup>. The four experimental environments  
76 were (i) basal, nutrient-rich broth (lysogeny broth, LB, at 37°C and buffered at pH  
77 7.0), plus three types of abiotic environmental variation which we expect to be  
78 relevant to pathogens in vivo: (ii) reduced pH (pH 6.5), as found in certain body  
79 compartments including abscesses and parts of the gastrointestinal (GI) tract<sup>22,23</sup>,  
80 (iii) increased temperature (42°C), as found in companion and livestock animals with  
81 higher core temperatures than humans<sup>24</sup>, and (iv) the presence of bile salts (0.5g/L  
82 bile salts), which bacteria must contend with in the GI tract<sup>25</sup>. We isolated and  
83 sequenced resistant mutants after exposure to each selection drug in each  
84 experimental environment. We then tested their resistance phenotypes (IC<sub>90</sub>, 90%  
85 inhibitory concentration) for the relevant selection drug and paired drug, again  
86 across all four experimental environments. Unlike past work, this manipulation of  
87 the experimental environment, during both isolation and phenotyping, in a fully  
88 factorial design allowed us to quantify the effects of local abiotic conditions on the  
89 emergence (which mutations appear in which treatments?) and expression (in which  
90 experimental environments do we see collateral effects from particular mutants?)

91 of collateral sensitivity for multiple candidate drug pairs. Although it was not our  
92 aim here to investigate the molecular mechanisms by which collateral effects arise,  
93 we place our results in the context of available physiological information where  
94 possible.

## 95 Results and Discussion

96

### 97 Different resistance mutations emerge in different abiotic conditions

98

99 We used whole-genome sequencing to identify genetic changes relative to the  
100 ancestral *E. coli* strain for 95 resistant mutants (Figure 1), each isolated after  
101 exposure to one of five antibiotics (*selection drug*, the antibiotic present on the agar  
102 plate used to select resistant mutants from ancestral cells) in four different abiotic  
103 environments (*selection environment*, the local abiotic conditions during overnight  
104 growth prior to plating and on the agar plate). We found different genes were  
105 mutated depending on which antibiotic bacteria were selected against (main effect  
106 of selection drug, PermAVOVA:  $F_{4,94} = 5.46$ ,  $p < 0.001$ ). However, we also found  
107 different genes were mutated depending on local abiotic conditions during the  
108 experiment (main effect of selection environment:  $F_{3,94} = 2.48$ ,  $p < 0.001$ ). The effect  
109 of selection environment varied among antibiotics (selection drug by selection  
110 environment interaction:  $F_{12,94} = 1.76$ ,  $p < 0.001$ ). There was an effect of selection  
111 environment only for mutants selected against cefuroxime ( $F_{3,17} = 7.04$ ,  $p < 0.001$ ),  
112 streptomycin ( $F_{3,18} = 2.27$ ,  $p < 0.05$ ), and trimethoprim ( $F_{3,22} = 1.97$ ,  $p < 0.05$ ). For  
113 example, we observed mutations in the penicillin binding protein *ftsI* when we  
114 selected for cefuroxime resistance, but only in the presence of bile (Figure 1).  
115 Similarly, *folA* mutations were more common when we selected for trimethoprim  
116 resistance in basal and low-pH environments (Figure 1), than in bile and high-  
117 temperature environments. In summary, the types of resistance mechanisms that  
118 emerged during our mutant screen depended on the local abiotic conditions. To  
119 investigate whether this effect was linked to variation of resistance phenotypes  
120 across resistance mutations and across abiotic environments, we assayed the  
121 selected mutants for resistance phenotypes to their corresponding selection drug in  
122 all four abiotic conditions.

123

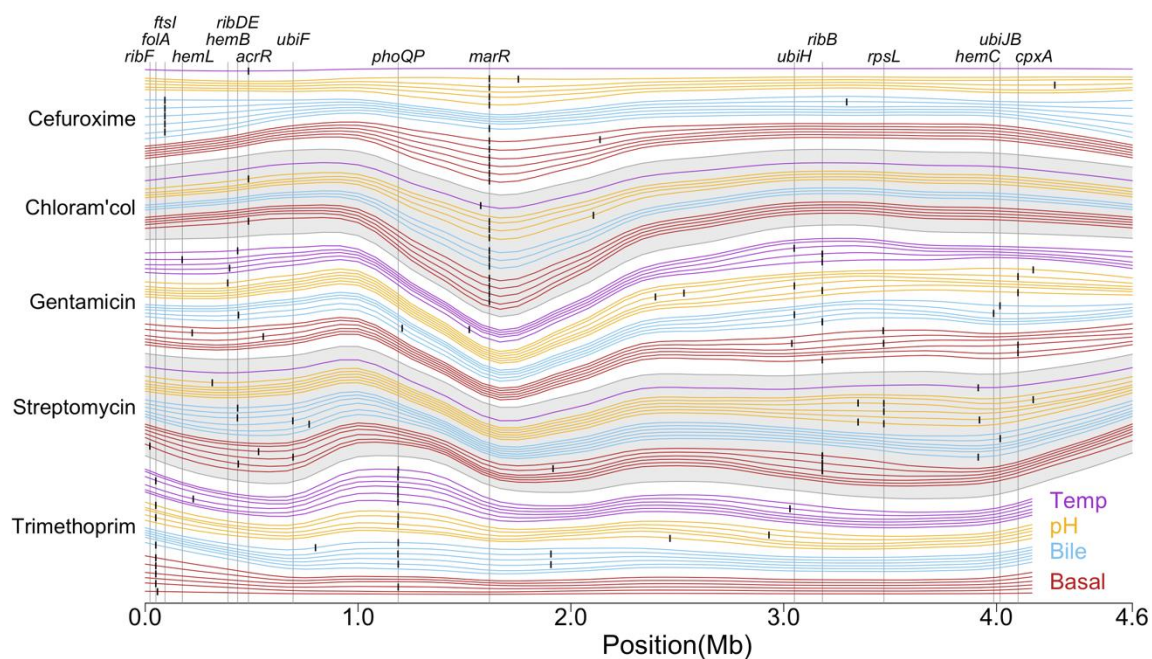

**Figure 1: Genotypes of mutants selected for resistance to different antibiotics in different selection environments.** Each horizontal line represents a mutant genotype, coloured by the environment where resistance was selected (selection environment, bottom right): basal conditions (red, pH 7.0, 37°C), with the addition of bile (blue, 0.5g/L bile salts), reduced pH (yellow, pH 6.5) or increased temperature (purple, 42°C). Genotypes are grouped according to which drug they were selected against (y-axis). Vertical dashes represent mutated regions; these mutated regions are spaced out to better separate the different genotypes (lines) at mutated loci. Gene families that were mutated in three or more independent resistant mutants are labelled at the top; note this includes some gene families where constituent genes are found at multiple separate positions in the genome (*ribFDEB*, *hemLBC* and *ubiFHJB*). Chloram'col is short for chloramphenicol.

124

125 Resistance to each selection drug depends on which gene is mutated and local abiotic  
126 conditions

127

128 For all antibiotics, mutants varied in their average resistance against the antibiotic  
129 used during isolation (selection drug) depending on which gene family was mutated  
130 (effect of genotype on fold-change in  $IC_{90}$  relative to the ancestor in the same  
131 conditions: Cefuroxime,  $F_{4,19} = 13.7$ ,  $p < 0.0001$ ; Chloramphenicol  $F_{3,79} = 36.4$ ,  
132  $p < 0.0001$ ; Gentamicin  $\chi^2_3 = 42.4$ ,  $p < 0.0001$ ; Streptomycin,  $F_{6,12} = 19.9$ ,  $p < 0.0001$

133 and Trimethoprim,  $\chi^2_4 = 57.4$ ,  $p < 0.0001$ ; Fig. 2). For example, mutations affecting  
134 *ubi* (involved in ubiquinone synthesis) and *rib* (involved in riboflavin synthesis) both  
135 conferred increased gentamicin resistance across all assay environments (Fig. 2c),  
136 but this effect was stronger for *ubi* mutants. For *ubi* mutants (and possibly *rib*  
137 mutants), resistance probably results from alterations to the electron transport  
138 chain<sup>26</sup>, reducing membrane potential which aminoglycosides rely on for uptake<sup>27</sup>.  
139 Thus, of the observed pathways to resistance in our experiment, some conferred  
140 larger increases in resistance than others.

141  
142 We next asked whether observed variation of resistance relative to the ancestral  
143 strain among different genotypes (with mutations in different genes) depended on  
144 the *assay environment* (the abiotic conditions during resistance testing). This was  
145 the case for mutants selected against cefuroxime (genotype by assay environment  
146 interaction:  $\chi^2_9 = 21.2$ ,  $p < 0.05$ ), chloramphenicol ( $\chi^2_6 = 18.6$ ,  $p < 0.01$ ) and  
147 streptomycin ( $\chi^2_{15} = 33.1$ ,  $p < 0.01$ ), but not gentamicin ( $\chi^2_9 = 5.75$ ,  $p > 0.5$ ) and  
148 trimethoprim ( $\chi^2_{12} = 17.1$ ,  $p > 0.1$ ). Some of these effects are consistent with the  
149 known physiological functions of affected genes. For example, both *acr* mutants and  
150 *mar* mutants had increased resistance to chloramphenicol, but *acr* mutants had  
151 relatively weak resistance when assayed in the bile environment (Fig. 2b). This may  
152 reflect the different roles of these genes in expression of the *acrAB* efflux pump  
153 (affected by mutations in both *acr* and *mar*<sup>28</sup>) and other protective functions  
154 (associated with *mar* mutations only<sup>29</sup>). The smaller change in chloramphenicol  
155 resistance relative to the ancestor for *acr* compared to *mar* mutants in the bile  
156 treatment may be because *acrAB* is induced by bile even in the ancestral strain<sup>19</sup>.  
157 By contrast, mutations in the *mar* operon maintained their chloramphenicol  
158 resistance relative to the ancestor, probably because of the other protective  
159 functions regulated by *mar*<sup>29</sup>.



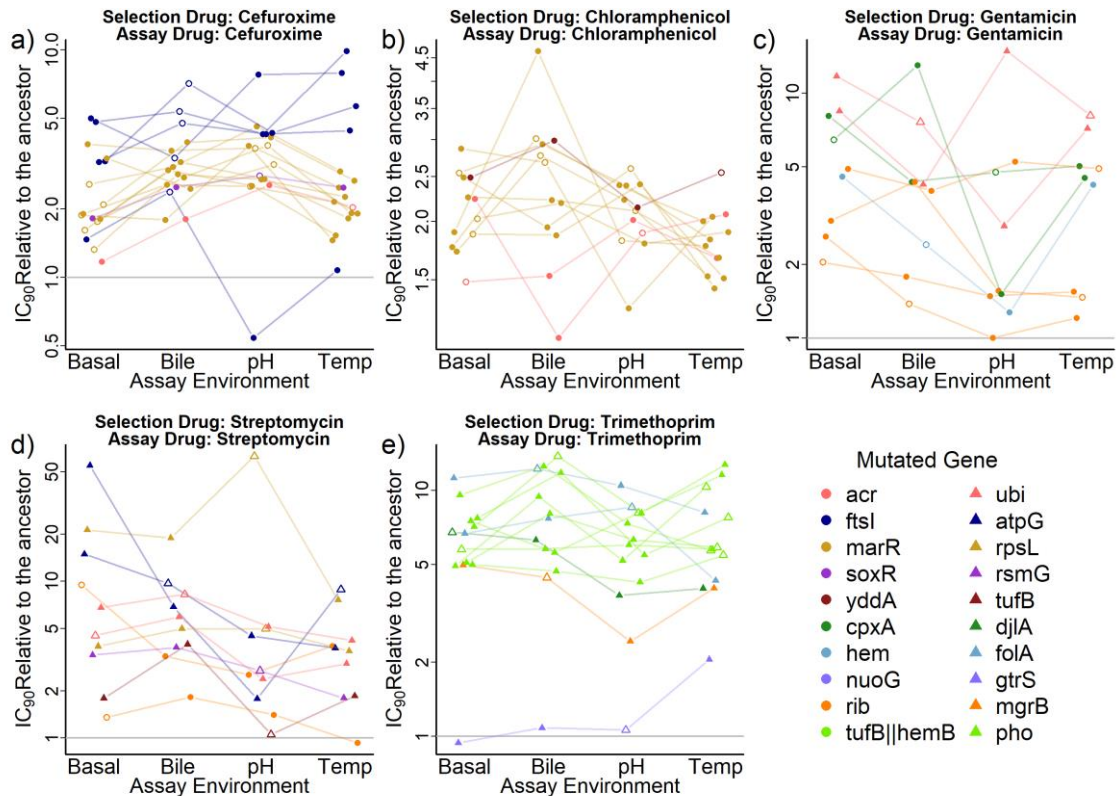

**Figure 2: Resistance of each mutant to the antibiotic they were isolated against (*selection drug* = *assay drug*), measured in four sets of abiotic conditions (*assay environment*). Each set of four connected points is a single resistant mutant that was selected for resistance to a) cefuroxime, b) chloramphenicol, c) gentamicin, d) streptomycin or e) trimethoprim. Mutants are coloured according to the gene or gene family that was mutated. Resistance is shown relative to the  $IC_{90}$  of the ancestral strain measured in the same assay environment ( $IC_{90}$ s for the ancestor across assay environments are shown in Fig. S1). Hollow points indicate sympatric combinations (selection environment = assay environment). Each point is the mean of 2-4 independent replicates (mean  $n = 3.82$ ). The y axis is log transformed and the scale varies between panels.**

160

161 Despite observing that different genes were mutated in different selection  
 162 environments, and that different mutated genes resulted in variable resistance  
 163 phenotypes, there was no significant variation of mean resistance among sets of  
 164 mutants from different selection environments (effect of selection environment on  
 165 resistance, likelihood ratio test:  $p > 0.05$  for all selection drugs). Furthermore, we  
 166 found no evidence that average resistance was higher for mutants tested in  
 167 sympatric environments (selection environment = assay environment) than in

168 allopatric environments (selection environment  $\neq$  assay environment) for any of the  
169 five selection drugs (Difference between sympatric and allopatric combinations,  
170 likelihood ratio test:  $p > 0.05$  in all cases). Thus, despite local abiotic conditions  
171 influencing which mutants emerged in our screen and how their resistance  
172 phenotypes were expressed, this did not result in average differences in resistance  
173 among selection environments or a pattern of local adaptation<sup>30,31</sup> in terms of  
174 maximal antibiotic concentrations that mutants could grow in ( $IC_{90}$ ).

175

176 We next analysed an alternative measure of resistance, growth of each mutant at  
177 the antibiotic concentration used during selection (GASC). Our rationale here was  
178 that the mutations most beneficial during our screen (and most likely to result in  
179 formation of viable, sampled colonies) are not necessarily the mutations that confer  
180 the largest increases in  $IC_{90}$ . Therefore GASC potentially provides additional  
181 information about why some types of mutants were associated with particular  
182 selection environments. GASC was calculated from the same dose response curves  
183 as the  $IC_{90}$  and was positively correlated with  $IC_{90}$  across all mutants (correlation:  
184  $\tau = 0.61$ ,  $p < 0.0001$ , Fig. S2). Like  $IC_{90}$ , variation of GASC was predicted by which gene  
185 was mutated and by the interaction between mutated gene and assay environment  
186 ( $p < 0.05$  for main effect for all antibiotics;  $p < 0.05$  for interaction term for 4  
187 antibiotics; Fig. S3). Unlike  $IC_{90}$ , GASC varied significantly among sets of cefuroxime-  
188 resistant mutants selected in different abiotic conditions, with bile-selected  
189 mutants performing best (effect of selection environment:  $\chi^2_3 = 10.7$ ,  $p < 0.05$ ; Fig.  
190 S3a). Thus, addition of bile biased our screen toward a relatively narrow set of  
191 mutants that grew well at the cefuroxime concentration used during selection (in  
192 particular, *ftsI* mutants; Fig. 1). Consistent with this, we observed resistant colonies  
193 in our mutant screen in fewer replicate populations exposed to bile+cefuroxime than  
194 other cefuroxime-selection environments (Fig. S4). Note *ftsI* mutants also had  
195 relatively high  $IC_{90}$ s on average (Fig. 2), although this did not translate to significant  
196 variation of mean  $IC_{90}$  among selection environments as tested above. For  
197 trimethoprim-selected mutants, average GASC did not vary among mutants from  
198 different selection environments (effect of selection environment:  $p > 0.1$ ). However,  
199 there was evidence of local adaptation, in that GASC was higher in sympatric (assay  
200 environment = selection environment) than allopatric (assay environment  $\neq$  selection



201 environment) combinations (effect of sympatry:  $\beta=0.063$ ,  $\chi^2_1 = 8.30$ ,  $p<0.01$ ). For  
202 streptomycin (the other antibiotic where selection environment influenced which  
203 genes were mutated), the effect of sympatry was positive but just above the  
204 significance cut-off (effect of sympatry on GASC:  $\beta=0.04$ ,  $\chi^2_1 = 3.81$ ,  $p=0.051$ ). In  
205 summary, analysing GASC supported the variation of resistance depending on  
206 mutated gene and assay environment, as in our analyses of  $IC_{90}$  above, and revealed  
207 additional evidence that some selection environments favoured particular types of  
208 resistance mutations.

209

210 Collateral sensitivity and cross resistance depend on resistance mechanism and local abiotic  
211 conditions

212

213 We next tested whether resistant mutants for each selection drug showed variable  
214 susceptibility to paired drugs previously implicated in collateral sensitivity (for  
215 selection drugs cefuroxime, chloramphenicol, gentamicin, streptomycin and  
216 trimethoprim, the paired antibiotics were gentamicin<sup>6</sup>, polymyxin B<sup>6</sup>, cefuroxime<sup>6</sup>,  
217 tetracycline<sup>5</sup> and nitrofurantoin<sup>5</sup>). Unlike resistance to selection drugs, where there  
218 was an average increase in resistance relative to the ancestral strain (mean  $\pm$ s.d. of  
219  $\log_2$  transformed relative  $IC_{90}$ :  $1.78\pm 1.27$ , Fig. 2), the average fold change in  $IC_{90}$  to  
220 paired drugs was lower ( $0.12\pm 0.97$ , Fig. 3) and encompassed both positive (cross  
221 resistance) and negative (collateral sensitivity) changes in resistance. Average  
222 collateral resistance varied depending on which gene was mutated for mutants  
223 selected against gentamicin then tested against cefuroxime (Fig. 3c,  $F_{5,126} = 11.2$ ,  
224  $p<0.0001$ ) and mutants selected against trimethoprim and tested against  
225 nitrofurantoin (Fig. 3c,  $\chi^2_4 = 10.0$ ,  $p<0.05$ ), but not for the other three drug pairs  
226 ( $p>0.05$  in all cases). We found several genes that on average induced collateral  
227 sensitivity to paired drugs, such as *ubi* mutants which induced collateral sensitivity  
228 to cefuroxime (effect of *ubi* mutation on  $\log_2$  transformed relative  $IC_{90}$ :  $B = -1.27$ ,  
229  $t_{137}=5.68$ ,  $p<0.0001$ ) and *atpG* mutants which led to collateral sensitivity to  
230 tetracycline ( $B = -1.27$ ,  $t_{60}=2.31$ ,  $p<0.05$ ). Mutations in *ubi* genes and in *atpG* affect  
231 ubiquinone synthesis and the ATP synthase respectively disrupting the proton motive  
232 force (PMF), leading to a reduced membrane potential and hence reduced influx of  
233 aminoglycosides<sup>26</sup>. Despite the benefit of aminoglycoside resistance, PMF-driven

234 efflux pumps such as *acrAB* are less active in mutants with disrupted PMF<sup>5</sup>, increasing  
235 susceptibility to other drugs.

236

237 Because selection environment influenced which genes were mutated (Fig. 1), and  
238 in turn mutated gene influenced collateral resistance phenotypes to paired drugs  
239 (Fig. 3), we tested whether this translated to variation of mean resistance to paired  
240 drugs depending on selection environment. We found such an effect for mutants  
241 selected against streptomycin and assayed against tetracycline ( $\chi^2_3 = 8.58$ ,  $p < 0.05$ ).  
242 Here only mutants selected in the bile (relative IC<sub>90</sub> of bile selected mutants  $\beta =$   
243  $0.34$ ,  $t_{36} = 2.25$ ,  $p < 0.05$ ) and low pH ( $\beta = -0.35$ ,  $t_{36} = 2.25$ ,  $p < 0.01$ ) environments showed  
244 significant collateral sensitivity. We also found a significant effect of selection  
245 environment on resistance to nitrofurantoin for mutants selected against  
246 trimethoprim (effect of selection environment:  $\chi^2_3 = 12.6$ ,  $p < 0.01$ ). For these  
247 trimethoprim-selected mutants, *folA* mutations were more common in basal and pH  
248 selection environments (Fig. 1), and had increased nitrofurantoin resistance (effect  
249 of *folA* mutation on log<sub>2</sub> transformed relative IC<sub>90</sub>:  $\beta = 0.40$ ,  $t_{111} = 2.81$ ,  $p < 0.01$ ). By  
250 contrast *phoPQ* mutants, which did not have significantly altered nitrofurantoin  
251 resistance ( $\beta = -0.07$ ,  $t_{146} = 0.64$ ,  $p > 0.5$ ), were more common in the bile and high  
252 temperature selection environments. This shows that for some of the antibiotics and  
253 environments we tested, variation of the abiotic conditions during resistance  
254 evolution to one antibiotic resulted in variation of average collateral resistance to  
255 other antibiotics.

256

257 Expression of average collateral sensitivity / cross resistance to paired drugs also  
258 varied depending on the abiotic conditions during exposure to the paired drug. For  
259 mutants selected against cefuroxime, chloramphenicol and trimethoprim, there was  
260 a significant effect of assay environment on average resistance to the paired drug,  
261 relative to the ancestor in the same conditions (effect of assay environment for  
262 selection/paired drug: cefuroxime/gentamicin,  $\chi^2_3 = 44.6$ ,  $p < 0.0001$ ;  
263 chloramphenicol/polymyxin B,  $\chi^2_3 = 10.7$ ,  $p < 0.05$ ; trimethoprim/nitrofurantoin,  $\chi^2_3$   
264  $= 64.7$ ,  $p < 0.0001$ ). Note this variation of susceptibility relative to the ancestral strain  
265 was not explained by variable susceptibility of the ancestral strain across assay

266 environments (Fig. S1). Qualitatively similar results emerge (Fig. S1) if we use the  
267 absolute IC<sub>90</sub> value (not relative to the ancestor).

268

269 Changing the local abiotic conditions did not affect all mutants the same way: the  
270 mutated gene and assay environment interacted to determine resistance to paired  
271 drugs for three of the drug pairs (Genotype by assay environment interaction for  
272 selection/paired drug: cefuroxime/gentamicin,  $\chi^2_9 = 19.3$ ,  $p < 0.05$ ;  
273 chloramphenicol/polymyxin B,  $\chi^2_6 = 14.4$ ,  $p < 0.05$ ; gentamicin/cefuroxime,  $\chi^2_9 =$   
274 34.1,  $p < 0.001$ ). In some cases this variation led to a switch between cross resistance  
275 and collateral sensitivity, such as *cpxA* mutants which were resistant to cefuroxime  
276 in the bile and pH environments but were susceptible to cefuroxime at high  
277 temperature (Fig. 3c). *cpxA* is part of a two-component regulator which responds to  
278 misfolded proteins in the periplasm, activating the cpx response, which has been  
279 shown to confer resistance to aminoglycosides<sup>32</sup>. Mutations in the periplasmic  
280 domain of *cpxA* (as in our mutants) have the cpx pathway locked into an activated  
281 state<sup>33</sup>, with cpx phenotypes being more pronounced at high temperature<sup>34,35</sup>. Other  
282 work has shown that, due to its influence on cell wall homeostasis, the cpx response  
283 can influence resistance to  $\beta$ -lactams like cefuroxime, but that it must be at an  
284 intermediate level for maximal resistance<sup>36</sup>. At temperatures of 37°C our mutants  
285 likely upregulate the cpx response into the optimum zone, leading to  $\beta$ -lactam  
286 resistance. However at 42°C the mutant's cpx response is likely further  
287 upregulated<sup>34,35</sup>, meaning that peptidoglycan homeostasis is no longer maintained,  
288 resulting in  $\beta$ -lactam sensitivity<sup>36</sup>.

289

290 In summary, mutants selected for resistance to one antibiotic often had altered  
291 resistance to other antibiotics (as expected, having chosen these antibiotics based  
292 on past evidence of such effects). However, these collateral effects varied among  
293 different pathways to resistance (mutated genes), which translated to variation in  
294 average collateral effects depending on the abiotic conditions during selection for  
295 resistance to the first antibiotic (selection environment). Finally some collateral  
296 effects were only pronounced in specific environmental conditions.

297

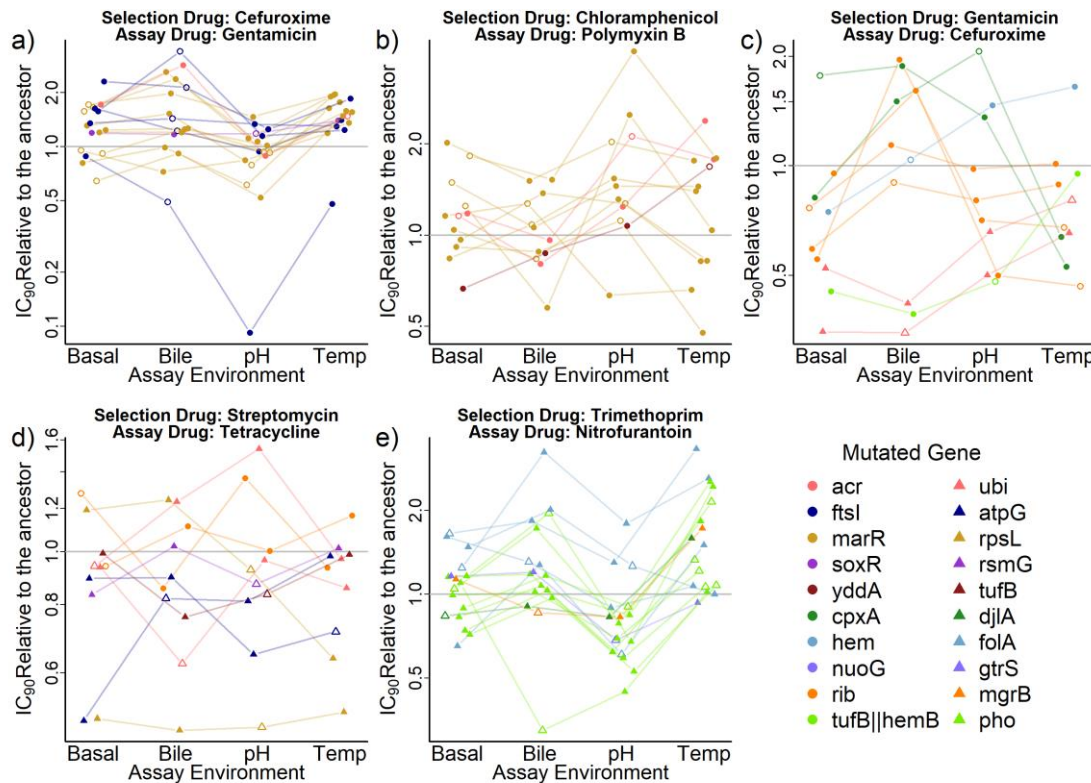

**Figure 3:** Collateral changes in resistance to a paired drug (*assay drug*) for resistant mutants selected with each *selection drug* (panels a-e), tested across different abiotic conditions (*x-axis, assay environments*). Each set of four connected points shows a single resistant mutant, coloured according to which gene was mutated (see legend). Resistance is shown relative to the  $IC_{90}$  of the ancestral strain in the same assay environment (scores for the ancestor are shown in Fig. S1). Hollow points indicate sympatric combinations (selection environment = assay environment). Each point is the mean of 2-4 independent replicates (mean  $n = 3.83$ ). The y axis is log transformed and the scale varies between panels.

298

299 [Antibiotic-free growth depends on resistance mechanism and local abiotic conditions](#)

300

301 Antibiotic resistance is frequently associated with a cost in terms of impaired growth  
 302 in the absence of antibiotics, and variation of this cost is a key driver of the long-  
 303 term persistence of resistance<sup>37</sup>. In our mutant-selection experiment bacteria were  
 304 grown in the absence of antibiotics prior to plating. Therefore, variable costs of  
 305 resistance across selection environments could potentially have influenced which  
 306 mutations we detected in which sets of conditions. We investigated this by  
 307 quantifying the growth capacity of each mutant in the absence of antibiotics, using

308 the same dataset used to calculate the IC<sub>90</sub> values (see methods). Relative to the  
309 ancestral strain in the absence of antibiotics (mean final optical density  $\pm$  standard  
310 deviation:  $0.90 \pm 0.16$ ), most types of resistant mutants showed evidence of average  
311 growth costs, although this varied depending on the selection drug (gentamicin  
312  $0.62 \pm 0.34$ ; streptomycin  $0.49 \pm 0.29$ ; cefuroxime  $0.89 \pm 0.21$ ; chloramphenicol  
313  $0.82 \pm 0.15$ ; trimethoprim  $0.80 \pm 0.21$ ).

314  
315 For all selection drugs, mean antibiotic-free growth varied depending on which gene  
316 was mutated (effect of mutated gene on antibiotic-free growth: cefuroxime-  
317 selected mutants,  $F_{4,17} = 128$ ,  $p < 0.0001$ ; chloramphenicol,  $F_{3,70} = 601$ ,  $p < 0.0001$ ;  
318 gentamicin,  $F_{6,12} = 30.6$ ,  $p < 0.0001$ ; streptomycin,  $F_{6,10} = 14.9$ ,  $p < 0.0001$ ;  
319 trimethoprim,  $F_{5,19} = 256$ ,  $p < 0.0001$ ). For example, streptomycin-resistant mutants  
320 with mutations in *atpG* grew relatively poorly (Fig 4d). For trimethoprim-resistant  
321 mutants, this variation translated to differences in average antibiotic-free growth  
322 among sets of mutants from different selection environments (effect of selection  
323 environment:  $\chi^2_3 = 17.3$ ,  $p < 0.001$ ; Fig. 4e). With this antibiotic, the mutants selected  
324 at high temperature and included in our phenotyping assay (in 5/5 cases, *phoPQ*  
325 mutants, Table S1) grew relatively poorly across all antibiotic-free environments  
326 compared with other mutants (Fig. 4e). However, when assayed at high temperature  
327 the *phoPQ* mutants were on average more resistant (Fig. 2e and Fig. S3e) than other  
328 types of mutants. This suggests that *phoPQ* mutants were less frequently isolated  
329 from selection environments at 37°C because the cost of the resistance mutation  
330 was not counterbalanced by more effective resistance in these selection  
331 environments. This is also consistent with the local adaptation we saw above for  
332 these mutants in our analysis of their growth at selection concentration (GASC).

333  
334 For all selection drugs, variation of antibiotic-free growth among different  
335 genotypes depended on the local abiotic conditions (genotype by assay environment  
336 interaction: cefuroxime:  $\chi^2_9 = 24.0$ ,  $p > 0.01$ ; chloramphenicol:  $\chi^2_6 = 26.6$ ,  $p < 0.001$ ;  
337 gentamicin:  $\chi^2_{15} = 43.6$ ,  $p < 0.001$ ; streptomycin:  $\chi^2_{15} = 36.8$ ,  $p < 0.01$  and trimethoprim  
338  $\chi^2_{12} = 63.1$ ,  $p < 0.0001$ ). Despite this, we did not find any evidence of local adaptation  
339 in terms of antibiotic-free growth ( $p > 0.05$  for all selection drugs).

340



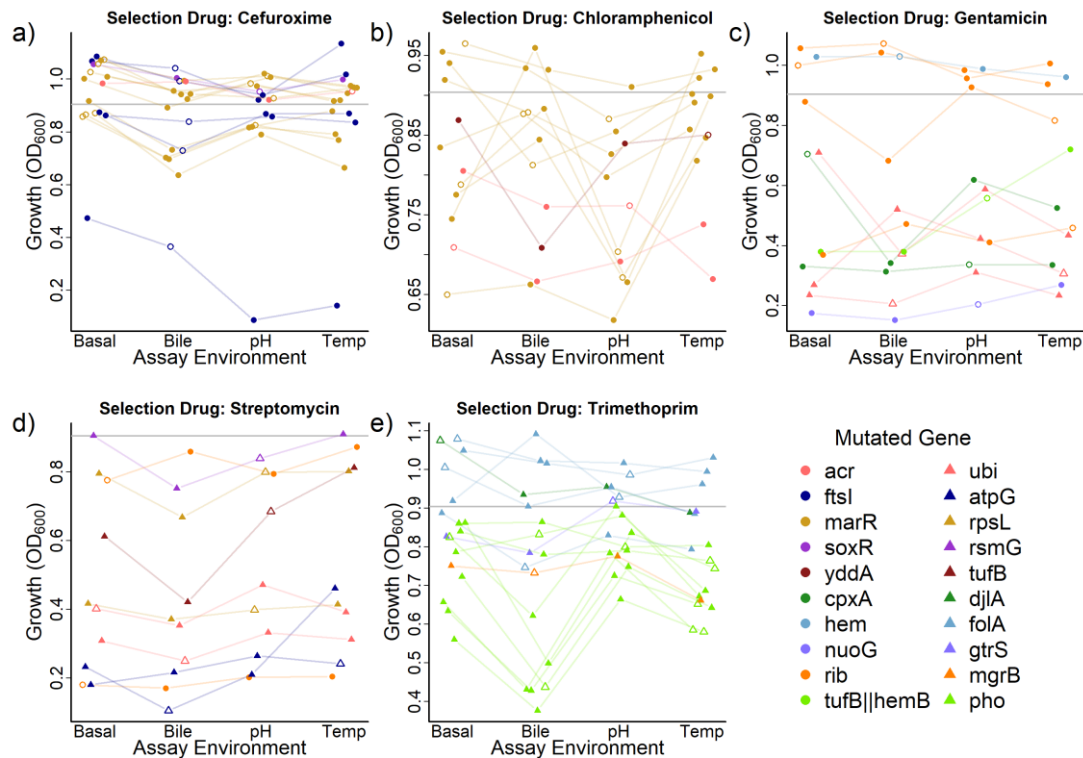

**Figure 4: Antibiotic-free growth of resistant mutants selected with each *selection drug* (panels a-e), measured in four different *assay environments*. Each set of four connected points shows a single resistant mutant, coloured according the gene or gene family that was mutated. Growth was measured in the absence of antibiotics as optical density (OD<sub>600</sub>) after 20h. Hollow points indicate sympatric combinations (selection environment = assay environment). The grey line shows the antibiotic-free growth of the ancestral strain. Points are means of 2-4 independent replicates (mean  $n = 3.89$ ). The y axis varies between panels.**

## 341 Conclusions

342

343 Our findings have important implications for research that aims to exploit collateral  
 344 sensitivity in novel treatment approaches. For example, among our streptomycin-  
 345 resistant mutants, only those selected in the bile and pH environments showed  
 346 significant collateral sensitivity. Thus, streptomycin treatment of enteric *E. coli*  
 347 (exposed to low pH and bile) could potentially select for mutants that are  
 348 collaterally sensitive to tetracycline, but this may be less likely in other  
 349 environments. Studies of collateral sensitivity will therefore be most relevant when  
 350 they account for environmental variation, for example by focusing on resistant  
 351 mutants that arise under conditions similar to those during infection, or testing  
 352 explicitly for variation across abiotic conditions (as above). This will ensure

353 collateral effects of mutations specific to the infection environment are not  
354 overlooked, and that collaterally sensitive mutants specific to the lab environment  
355 are not given undue attention. Note our study included only chromosomal mutants  
356 derived from a single strain, albeit of an important commensal and opportunistically  
357 pathogenic species. Nevertheless, some of the resistance mechanisms we identified  
358 are known to be important in natural and clinical populations, such as mutations in  
359 genes for efflux pumps (*acr*)<sup>38</sup>, global regulators (*marR*, *phoPQ*)<sup>39-41</sup> and specific  
360 antibiotic targets (*ftsI* and *rpsL*)<sup>42-44</sup>, suggesting our findings are relevant beyond  
361 laboratory studies. A key question for future work is whether collateral effects of  
362 resistance encoded on plasmids<sup>45,46</sup>, which is common in clinics, show similar  
363 sensitivity to abiotic conditions as we saw here. We speculate this is likely, because  
364 plasmids can carry accessory genes with fitness effects that are strongly affected by  
365 the abiotic environment<sup>47,48</sup>.

366

367 To ensure that clinically relevant mutants are assayed for collateral sensitivity,  
368 several past studies have looked at clinical isolates directly<sup>10,49,50</sup>. However, these  
369 studies each measured collateral sensitivity in a single lab environment. Our results  
370 suggest this can potentially lead to overlooking collateral sensitivity interactions  
371 that occur in the infectious environment. For example, if we had only tested *cpxA*  
372 mutants at 37°C, as has been done previously<sup>51,52</sup>, we would have only observed  
373 that they mediate cross resistance between gentamicin and cefuroxime. This would  
374 miss the collateral sensitivity of these mutants at higher temperature, a potentially  
375 interesting target for collateral sensitivity in *E. coli* infecting hosts with higher body  
376 temperatures, e.g. poultry<sup>24</sup>. The changing expression of collateral effects with  
377 abiotic conditions therefore represents an important variable which should be  
378 considered if we are to design robust treatment regimens around collateral  
379 sensitivity. Of course, our experiments were still restricted to simplified lab  
380 conditions. Our aim here was to demonstrate that even relatively minor (but still  
381 relevant to nature) manipulations of the abiotic environment can modify collateral  
382 sensitivity interactions. Our finding that such effects are strong suggests other  
383 differences between complex within-host or natural environments and in vitro  
384 screening conditions are likely to modify expression of collateral resistance even  
385 further.

386

387 In summary, we found local abiotic conditions modified collateral sensitivity  
388 interactions by two principal mechanisms. First, antibiotic treatment in different  
389 abiotic environments selects for different pathways to resistance (Fig. 1), and these  
390 are sometimes associated with variable collateral effects. For the three selection  
391 drugs where we found selection environment influenced which mutations occurred  
392 (cefuroxime, streptomycin and trimethoprim), the mutants selected in different  
393 environments had different resistance phenotypes, both to the selection drug and  
394 collateral effects to other drugs. Second, for individual mutants, expression of  
395 collateral sensitivity or cross resistance can depend strongly on local abiotic  
396 conditions. For example, we found some gentamicin-resistant mutants were cross  
397 resistant or collaterally sensitive to cefuroxime depending on the assay  
398 environment. This is consistent with a more general trend that the phenotypic  
399 effects of antibiotic resistance mechanisms are highly sensitive to genotype by  
400 environment interactions<sup>16-18,53</sup>. Critically, this suggests for some antibiotic  
401 combinations, the effectiveness of the second drug against bacteria that have  
402 evolved resistance to the first drug, and consequently selection on resistance to  
403 both drugs, will depend on the abiotic environment. While collateral sensitivity still  
404 holds great promise as a way to prolong the effectiveness of available treatments,  
405 we suggest doing so will be most effective if we account for local abiotic conditions.

## 406 Methods

407

### 408 Organisms and growth conditions

409 We used *Escherichia coli* MG1655 as the ancestral organism, grown at 37°C in static  
410 100µl cultures in 96-well microplates unless otherwise stated. The media used was  
411 based around lysogeny broth (LB, Sigma Aldrich) with additions to the media to  
412 create variation in environmental conditions for basal, pH, and bile media. Basal  
413 media (the base condition) is LB buffered at pH 7.0 with 0.1M sodium hydrogen  
414 phosphate ( $\text{Na}_2\text{HPO}_4$  and  $\text{NaH}_2\text{PO}_4$ ). pH media (acidic pH), is LB buffered at pH 6.5  
415 with 0.1M sodium hydrogen phosphate. Bile media is LB with the addition of 0.5 g/L  
416 of bile salts and buffered at pH 7.0 with 0.1M sodium hydrogen phosphate. The  
417 temperature treatment uses the basal media but is incubated at 42°C. When these

418 conditions were on solid media (i.e. to select for resistant colonies) we instead used  
419 LB agar (Sigma Aldrich), but other temperature and media additions were the same.  
420 For overnight culture prior to assay we incubated at 37°C in diluted LB (1:2  
421 LB:water).

422

### 423 [Mutant isolation](#)

424 We screened for mutants resistant to each selection drug in each selection  
425 environment by first culturing the ancestral *E. coli* strain in each of the 4  
426 environments for 20 hours in the absence of antibiotics. After 20 hours growth, each  
427 entire culture was transferred to a well of a 24-well plate containing 1ml of agar  
428 corresponding to the same environment as the prior liquid culture plus one of five  
429 antibiotics at selection concentration (cefuroxime [selection concentration = 6  $\mu\text{gml}^{-1}$   
430  $^{-1}$ ], chloramphenicol [6  $\mu\text{gml}^{-1}$ ], gentamicin [24  $\mu\text{gml}^{-1}$ ], streptomycin [72  $\mu\text{gml}^{-1}$ ] and  
431 trimethoprim [0.5  $\mu\text{gml}^{-1}$ ]). These selection concentrations were approximately  
432 equal to minimal inhibitory concentrations for the ancestor. This meant the  
433 ancestral strain was effectively killed, but mutants with even moderately increased  
434 resistance could grow. A higher selection concentration was used for the  
435 aminoglycosides (gentamicin, 48  $\mu\text{gml}^{-1}$ ; streptomycin, 144  $\mu\text{gml}^{-1}$ ) in the pH media  
436 because of the reduced efficacy against the ancestral strain in this environment <sup>27</sup>.  
437 The agar with bacterial culture was incubated for 48 hours at 37 or 42°C. This  
438 protocol was used to test 92 independent *E. coli* populations against each  
439 combination of 4 selection environments and 5 selection drugs (1840 populations  
440 total). After incubation, each agar well was checked for the appearance of resistant  
441 colonies (the number of populations that produced colonies is shown in figure S4).  
442 Up to 6 colonies for each drug by environment combination were picked from 6  
443 randomly selected, independent agar wells (populations). These colonies were  
444 grown in LB without antibiotics for 3 hours before glycerol was added to 25% of the  
445 final volume and mutants were frozen at -80°C. Mutant isolation in the basal, pH  
446 and temperature environments was done in the same temporal block, and the bile  
447 environment in a separate block. For a minority of mutants, we were unable to  
448 consistently revive the frozen stock for library preparation for sequencing and/or  
449 for phenotyping. These were excluded from the relevant assays and analysis (see  
450 Table S1 for details).

451

## 452 [Genome sequencing and bioinformatics](#)

453 Genomic DNA from 110 mutants plus the ancestral strain was extracted with the  
454 Genomic-tip 20/G Kit (Cat. No. 10223, Qiagen) according to the manufacturer's  
455 instructions. Libraries were produced using the Illumina Nextera XT kit. Sequencing  
456 was performed on the Illumina HiSeq 4000 platform with 150 bp paired end reads at  
457 the Functional Genomic Center, Zürich, Switzerland (Fig. 1). Reads were trimmed  
458 using trimomatic<sup>54</sup> and then analysed using the breseq pipeline<sup>55,56</sup>. Each mutant  
459 should be clonal with respect to the mutations contributing to resistance, so we only  
460 considered mutations that were at frequency of greater than 75%. For mutants that  
461 had putative resistance mutations at a frequency 20%-75%, we replica plated 20  
462 colonies with and without the selective conditions (selection environment +  
463 selection drug). Where the frequency of resistant colonies was consistent with the  
464 frequency of the putative resistance mutation, we picked one resistant colony (from  
465 the non-selective plate), re-cultured it and used it in phenotyping, otherwise the  
466 mutant was not used for further analysis. Finally, several strains did not have high-  
467 frequency mutations which could be attributed to resistance, so were not used for  
468 further analysis. Once we had completed these filtering steps, we gained full  
469 genotypic information for 95 strains.

470

## 471 [Measuring resistance to selection drugs and other drugs](#)

472 So as to make the phenotyping manageable, we selected 85 mutants (and the  
473 ancestor) to phenotype, excluding mutants where very similar genotypes were  
474 already represented (Table S1). Resistance of all mutants and the ancestral strain  
475 was quantified using broth dilution. For each antibiotic, we assayed each  
476 combination of strain, assay environment and antibiotic concentration in four  
477 replicates, each in a separate temporal block. In each block of assays, we used a  
478 frozen masterplate containing all strains organized in one of three randomized  
479 layouts (blocks 1, 2, 3 and 4 used layouts 1, 2, 3 and 1) to inoculate a single pre-  
480 culture plate (1:2 LB:water). We then incubated the pre-culture plate for 3 hours  
481 before using it to inoculate all the overnight plates (for every assay culture we grew  
482 a separate overnight culture). Overnight cultures were then used to inoculate the  
483 assay plates using a pin replicator. Each mutant was tested against the relevant



484 selection- and paired- drugs, and the ancestor was tested against all drugs, each at  
485 8 concentrations (including zero) in each assay environment. After culturing assay  
486 plates for 20 hours, we agitated the plates to resuspend bacteria, then measured  
487 the biomass of bacteria by optical density at 600nm (OD<sub>600</sub>) using a  
488 spectrophotometer (Infinite®200 PRO, Tecan Trading AG, Switzerland). Due to the  
489 time taken to read 64 plates, incubation and plate reading was staggered and the  
490 order was randomised. Some mutants failed to regrow during overnight incubation,  
491 resulting in false inoculation of some assay wells. To filter out these false negatives,  
492 we excluded OD<sub>600</sub> scores from assay plates that were <0.075, but only if the OD<sub>600</sub>  
493 in the overnight well (prior to inoculation of the assay well) was also <0.075.

494

#### 495 Calculation of summary phenotypes from dose response data

496 For each mutant strain we calculated 4 phenotypes 1) 90% inhibitory concentration  
497 (IC<sub>90</sub>) to the selection drug, 2) growth at selection concentration (GASC) for the  
498 selection drug, 3) IC<sub>90</sub> to the paired drug and 4) growth in absence of antibiotics.  
499 These phenotypes were calculated from the dose response relationship data for the  
500 selection and paired drugs (for each replicate separately). We fitted a Hill function  
501 using non-linear least squares in R<sup>57</sup>:

502

$$503 \quad OD = \frac{A k^n}{k^n + C^n} \quad (Eqn. 1)$$

504

505 Where OD is the measured optical density and C is the drug concentration. A is then  
506 the asymptote, k is the inflection point of the curve and n is the Hill parameter  
507 controlling curve steepness. Thus, growth in the absence of antibiotics is equal to  
508 A, and for each combination of mutant and assay environment is the mean of the A  
509 parameters for all dose-response curves. The IC<sub>90</sub> for the selection and paired drugs  
510 can be calculated using the following formula taking the parameters from the  
511 relevant fitted curve.

512

$$513 \quad IC_{90} = e^{\left[ \ln(k) + \frac{\ln(9)}{n} \right]} \quad (Eqn. 2)$$

514

515 Finally, the growth at selection concentration (GASC) is the value of the Hill function  
516 when the antibiotic concentration equals the selection concentration.

517

518 For some strain : drug : environment combinations we could not robustly fit a Hill  
519 function to some or all replicates, for example if there was very little growth  
520 inhibition or if the dose response was strongly stepwise. In these cases, where  
521 possible, we calculated phenotypes independently from the fitting of dose response  
522 curves (as is often done in other studies<sup>6</sup>). We estimated growth in the absence of  
523 antibiotics from the OD in the absence of antibiotics. We took the IC<sub>90</sub> as the lowest  
524 tested concentration where growth was below 10% of growth in the absence of  
525 antibiotics. Finally, we took growth at selection concentration as the OD score at  
526 the selection concentration of the antibiotic, or the predicted score at the selection  
527 concentration assuming a linear relationship between growth and drug  
528 concentration between the two measured concentrations on either side of the  
529 selection concentration. We used these fit-independent methods for a minority of  
530 cases (9.7% for antibiotic free growth, 5.3% for selection drug IC<sub>90</sub>, 7.6% for pair drug  
531 IC<sub>90</sub>, and 8.6% for GASC). In all cases there was a strong correlation between the fit-  
532 dependent and fit-independent measures (Fig S5).

533

### 534 [Statistics](#)

535 We treated the mutants selected for resistance against different antibiotics as five  
536 independent data sets, due to the difficulty in comparing resistance across multiple  
537 antibiotics. In each dataset, we took the four phenotypes of interest (see above) as  
538 response variables in separate models. In each model, the replicate measures for  
539 each phenotype came from independent dose response curves (fitted to data  
540 collected in different blocks). Mutants with insufficiently replicated data (<2  
541 replicates in any of the four assay environments) for a given phenotype were  
542 excluded from the analysis for that phenotype (Table S1). We transformed IC<sub>90</sub>  
543 values by taking log<sub>2</sub>(IC<sub>90</sub>) relative to the mean of the ancestral strain measured in  
544 the same environment. This controlled for any effects of assay environment on  
545 antibiotic-inhibition of the ancestral strain (Fig. S1) and normalised the data. GASC  
546 was square-root transformed to fit the assumption of normality, but was not relative  
547 to the ancestor as the GASC was not significantly different from zero in the ancestor,

548 as expected. Growth in the absence of antibiotics already fit the assumptions of  
549 normality was not analysed relative to the ancestor because the ancestral growth  
550 did not vary significantly between assay environments ( $\chi^2_3 = 5.95$ ,  $p > 0.05$ ).

551

552 Then for each of the 4 phenotypes across the 5 datasets we fitted two mixed effects  
553 models (Table S2). The fixed effects of these two models were:

554

555 Phenotype ~ Genotype + Assay\_environment + ...  
556 ...Genotype:Assay\_environment (Model A, Eqn. 3)

557

558 Phenotype ~ Selection\_environment + ...  
559 ... Assay\_environment + Sympatry (Model B, Eqn. 4)

560

561 Where genotype is based on the gene or operon mutated (so that mutants with  
562 different mutations in the same gene/operon have the same genotype), and  
563 sympatry is a binary vector indicating whether selection environment is the same as  
564 assay environment. Model A was used to test whether genotypes varied in their  
565 average phenotypes (effect of genotype) and whether that variation depended on  
566 the local abiotic conditions (genotype by assay environment interaction). To test the  
567 effect of selection environment, we used a separate model (B) because genotype  
568 and selection environment were often confounded. Model B was used to test  
569 whether each phenotype varied on average among sets of mutants isolated from  
570 different selection environments (effect of selection environment), and for evidence  
571 of local adaptation in terms of higher average phenotypic scores in sympatric  
572 compared to allopatric combinations (main effect of sympatry, where sympatry  
573 means selection environment = assay environment, and allopatry means selection  
574 environment  $\neq$  assay environment)<sup>31</sup>.

575

576 In both models we included a nested random effect of strain (individual mutant ID)  
577 on intercept (+ (1|Strain) in the lmer function) to account for variation between  
578 strains<sup>58</sup>. We also included a random effect of block nested within strain on the  
579 intercept (+ (1|Strain:Block) in the lmer function), to account for variation between  
580 measures of the same strain in different blocks. To prevent overfitting, the variance

581 explained by these random effects was tested using a likelihood ratio test (on the  
582 maximal model) and non-significant terms were dropped, potentially reducing to  
583 fixed effects model if both random effects were dropped.

584  
585 Significance of terms in models is reported from minimal models by comparing  
586 models with or without the term of interest using a likelihood ratio test ( $\chi^2$  statistic),  
587 except when the main effect of genotype is involved in a significant higher order  
588 interaction (genotype: assay\_environment). In these cases, the main effect cannot  
589 be dropped, so significance is instead reported with an F test (on a type III ANOVA),  
590 using the approximate degrees of freedom calculated using lmerTest<sup>59</sup>. Although  
591 assay environment is included in both models, we report the significance of the main  
592 effect of assay environment from model B, where it does not have higher order  
593 interactions and can always be tested using a likelihood ratio test.

594

595 To test for significant differences between mutations acquired by mutants selected  
596 in the four selection environments, we used a permutational ANOVA on the data for  
597 which genes were affected by the mutations (Table 2, full genotype). This was  
598 performed using the adonis function in the vegan package<sup>60</sup>.

599

## 600 Acknowledgements

601

602 RCA was funded by the a postdoctoral fellowship from ETH Zurich and Marie Curie  
603 Actions for People (FEL-28 16-1). ARH was funded by SNSF Project 31003A\_165803.

604

## 605 Bibliography

606

607 1. World Health Organization (WHO). Antimicrobial Resistance Global Report on  
608 Surveillance. 1-9 (2014).

609 2. Ling, L. L. *et al.* A new antibiotic kills pathogens without detectable  
610 resistance. *Nature* **517**, 1-18 (2015).

611 3. Coates, A. R., Halls, G. & Hu, Y. Novel classes of antibiotics or more of the  
612 same? *Br. J. Pharmacol.* **163**, 184-194 (2011).

613 4. Read, A. F. & Huijben, S. Evolutionary biology and the avoidance of

- 614 antimicrobial resistance. *Evol. Appl.* **2**, 40-51 (2009).
- 615 5. Lázár, V. *et al.* Bacterial evolution of antibiotic hypersensitivity. *Mol. Syst.*  
616 *Biol.* **9**, (2013).
- 617 6. Imamovic, L. & Sommer, M. O. A. Use of collateral sensitivity networks to  
618 design drug cycling protocols that avoid resistance development. *Sci. Transl.*  
619 *Med.* **5**, (2013).
- 620 7. Pál, C., Papp, B. & Lázár, V. Collateral sensitivity of antibiotic-resistant  
621 microbes. *Trends Microbiol.* **23**, 401-407 (2015).
- 622 8. Baym, M., Stone, L. K. & Kishony, R. Multidrug evolutionary strategies to  
623 reverse antibiotic resistance. *Science (80-. )*. **351**, (2016).
- 624 9. Barbosa, C., Beardmore, R., Schulenburg, H. & Jansen, G. Antibiotic  
625 combination efficacy (ACE) networks for a *Pseudomonas aeruginosa* model.  
626 *PLoS Biol.* **16**, 1-25 (2018).
- 627 10. Podnecky, N. L. *et al.* Conserved collateral antibiotic susceptibility networks  
628 in diverse clinical strains of *Escherichia coli*. *Nat. Commun.* **9**, (2018).
- 629 11. Nichol, D. *et al.* Antibiotic collateral sensitivity is contingent on the  
630 repeatability of evolution. *Nat. Commun.* **10**, (2019).
- 631 12. Barbosa, C. *et al.* Alternative evolutionary paths to bacterial antibiotic  
632 resistance cause distinct collateral effects. *Mol. Biol. Evol.* **34**, 2229-2244  
633 (2017).
- 634 13. Barbosa, C., Roemhild, R., Rosenstiel, P. & Schulenburg, H. Evolutionary  
635 stability of collateral sensitivity to antibiotics in the model pathogen  
636 *pseudomonas aeruginosa*. *Elife* **8**, 1-22 (2019).
- 637 14. Maltas, J. & Wood, K. B. Pervasive and diverse collateral sensitivity profiles  
638 inform optimal strategies to limit antibiotic resistance. *PLOS Biol.* **17**,  
639 e3000515 (2019).
- 640 15. Roemhild, R., Linkevicius, M. & Andersson, D. I. Molecular mechanisms of  
641 collateral sensitivity to the antibiotic nitrofurantoin. *PLoS Biol.* **18**, 1-20  
642 (2020).
- 643 16. Hall, A. R., Angst, D. C., Schiessl, K. T. & Ackermann, M. Costs of antibiotic  
644 resistance - Separating trait effects and selective effects. *Evol. Appl.* **8**, 261-  
645 272 (2015).
- 646 17. Paulander, W., Maisnier-Patin, S. & Andersson, D. I. The fitness cost of



- 647 streptomycin resistance depends on rpsL mutation, carbon source and RpoS  
648 ( $\sigma$ S). *Genetics* **183**, 539-546 (2009).
- 649 18. Petersen, A., Aarestrup, F. M. & Olsen, J. E. The in vitro fitness cost of  
650 antimicrobial resistance in *Escherichia coli* varies with the growth conditions.  
651 *FEMS Microbiol. Lett.* **299**, 53-59 (2009).
- 652 19. Rosenberg, E. Y., Bertenthal, D., Nilles, M. L., Bertrand, K. P. & Nikaido, H.  
653 Bile salts and fatty acids induce the expression of *Escherichia coli* AcrAB  
654 multidrug efflux pump through their interaction with Rob regulatory protein.  
655 *Mol. Microbiol.* **48**, 1609-1619 (2003).
- 656 20. Lin, D. L. *et al.* Inhibition of aminoglycoside 6'-N-acetyltransferase type Ib by  
657 zinc: Reversal of amikacin resistance in *Acinetobacter baumannii* and  
658 *Escherichia coli* by a zinc ionophore. *Antimicrob. Agents Chemother.* **58**, 4238-  
659 4241 (2014).
- 660 21. Rodríguez-Verdugo, A., Gaut, B. S. & Tenaillon, O. Evolution of *Escherichia*  
661 *coli* rifampicin resistance in an antibiotic-free environment during thermal  
662 stress. *BMC Evol. Biol.* **13**, (2013).
- 663 22. Evans, D. F. *et al.* Measurement of gastrointestinal pH profiles in normal  
664 ambulant human subjects. *Gut* **29**, 1035-1041 (1988).
- 665 23. Wagner, C., Sauermann, R. & Joukhadar, C. Principles of antibiotic  
666 penetration into abscess fluid. *Pharmacology* **78**, 1-10 (2006).
- 667 24. Troxell, B. *et al.* Poultry body temperature contributes to invasion control  
668 through reduced expression of *Salmonella* pathogenicity island 1 genes in  
669 *Salmonella enterica* serovars typhimurium and enteritidis. *Appl. Environ.*  
670 *Microbiol.* **81**, 8192-8201 (2015).
- 671 25. Gunn, J. S. Mechanisms of bacterial resistance and response to bile. *Microbes*  
672 *Infect.* **2**, 907-913 (2000).
- 673 26. Muir, M. E., Hanwell, D. R. & Wallace, B. J. Characterization of a respiratory  
674 mutant of *Escherichia coli* with reduced uptake of aminoglycoside antibiotics.  
675 *BBA - Bioenerg.* **638**, 234-241 (1981).
- 676 27. Damper, P. D. & Epstein, W. Role of the membrane potential in bacterial  
677 resistance to aminoglycoside antibiotics. *Antimicrob. Agents Chemother.* **20**,  
678 803-808 (1981).
- 679 28. Okusu, H., Ma, D. & Nikaido, H. AcrAB efflux pump plays a major role in the

- 680 antibiotic resistance phenotype of *Escherichia coli* multiple-antibiotic-  
681 resistance (Mar) mutants. *J. Bacteriol.* **178**, 306-308 (1996).
- 682 29. Sharma, P. *et al.* The multiple antibiotic resistance operon of enteric bacteria  
683 controls DNA repair and outer membrane integrity. *Nat. Commun.* **8**, 1-11  
684 (2017).
- 685 30. Kawecki, T. J. & Ebert, D. Conceptual issues in local adaptation. *Ecol. Lett.*  
686 **7**, 1225-1241 (2004).
- 687 31. Blanquart, F., Kaltz, O., Nuismer, S. L. & Gandon, S. A practical guide to  
688 measuring local adaptation. *Ecol. Lett.* **16**, 1195-1205 (2013).
- 689 32. Mahoney, T. F. & Silhavy, T. J. The Cpx Stress Response Confers Resistance to  
690 Some, but Not All, Bactericidal Antibiotics. *J. Bacteriol.* **195**, 1869-1874  
691 (2013).
- 692 33. Raivio, T. L. & Silhavy, T. J. Transduction of envelope stress in *Escherichia*  
693 *coli* by the Cpx two- component system. *J. Bacteriol.* **179**, 7724-7733 (1997).
- 694 34. McEwen, J. & Silverman, P. M. Mutations in genes *cpxA* and *cpxB* alter the  
695 protein composition of *Escherichia coli* inner and outer membranes. *J.*  
696 *Bacteriol.* **151**, 1553-1559 (1982).
- 697 35. Pogliano, J. *et al.* Aberrant Cell Division and Random FtsZ Ring Positioning in  
698 *Escherichia coli* *cpxA*\* Mutants. *J. Bacteriol.* **180**, 3486-3490 (1998).
- 699 36. Delhaye, A., Collet, J. F. & Laloux, G. Fine-tuning of the Cpx envelope stress  
700 response is required for cell wall homeostasis in *Escherichia coli*. *MBio* **7**, 1-10  
701 (2016).
- 702 37. Andersson, D. I. & Hughes, D. Antibiotic resistance and its cost: Is it possible  
703 to reverse resistance? *Nat. Rev. Microbiol.* **8**, 260-271 (2010).
- 704 38. Webber, M. A. & Piddock, L. J. V. Absence of mutations in *marRAB* or *soxRS* in  
705 *acrB*-overexpressing fluoroquinolone-resistant clinical and veterinary isolates  
706 of *Escherichia coli*. *Antimicrob. Agents Chemother.* **45**, 1550-1552 (2001).
- 707 39. Luo, Q. *et al.* Molecular epidemiology and colistin resistant mechanism of *mcr*-  
708 positive and *mcr*-negative clinical isolated *Escherichia coli*. *Front. Microbiol.*  
709 **8**, (2017).
- 710 40. Cottell, J. L. *et al.* Complete sequence and molecular epidemiology of IncK  
711 epidemic plasmid encoding blaCTX-M-14. *Emerg. Infect. Dis.* **17**, 645-652  
712 (2011).

- 713 41. Atac, N. *et al.* The Role of AcrAB-TolC Efflux Pumps on Quinolone Resistance  
714 of *E. coli* ST131. *Curr. Microbiol.* **75**, 1661-1666 (2018).
- 715 42. Patiño-Navarrete, R. *et al.* Stepwise evolution and convergent recombination  
716 underlie the global dissemination of carbapenemase-producing *Escherichia*  
717 *coli*. *Genome Med.* **12**, 1-18 (2020).
- 718 43. Pelchovich, G., Schreiber, R., Zhuravlev, A. & Gophna, U. The contribution of  
719 common rpsL mutations in *Escherichia coli* to sensitivity to ribosome targeting  
720 antibiotics. *Int. J. Med. Microbiol.* **303**, 558-562 (2013).
- 721 44. Phelan, J. *et al.* Mycobacterium tuberculosis whole genome sequencing and  
722 protein structure modelling provides insights into anti-tuberculosis drug  
723 resistance. *BMC Med.* **14**, 1-13 (2016).
- 724 45. Fröhlich, C., Sørum, V., Thomassen, M., Johnsen, J. & Leiros, H. S. OXA-48-  
725 Mediated Ceftazidime-Avibactam Resistance Is Associated with Evolutionary  
726 Trade-Offs. *mSphere* 1-15 (2019). doi:10.1128/mSphere.00024-19
- 727 46. Rosenkilde, C. E. H. *et al.* Collateral sensitivity constrains resistance evolution  
728 of the CTX-M-15  $\beta$ -lactamase. *Nat. Commun.* **10**, 618 (2019).
- 729 47. Millan, A. S. *et al.* Integrative analysis of fitness and metabolic effects of  
730 plasmids in *Pseudomonas aeruginosa* PAO1. *ISME J.* 3014-3024 (2018).  
731 doi:10.1038/s41396-018-0224-8
- 732 48. Johnson, T. J. & Nolan, L. K. Pathogenomics of the Virulence Plasmids of  
733 *Escherichia coli*. *Microbiol. Mol. Biol. Rev.* **73**, 750-774 (2009).
- 734 49. Imamovic, L. *et al.* Drug-Driven Phenotypic Convergence Supports Rational  
735 Treatment Strategies of Chronic Infections. *Cell* **172**, 121-134.e14 (2018).
- 736 50. Jansen, G. *et al.* Association between clinical antibiotic resistance and  
737 susceptibility of *Pseudomonas* in the cystic fibrosis lung. *Evol. Med. Public*  
738 *Heal.* 182-194 (2016). doi:10.1093/emph/eow016
- 739 51. Lázár, V. *et al.* Genome-wide analysis captures the determinants of the  
740 antibiotic cross-resistance interaction network. *Nat. Commun.* **5**, (2014).
- 741 52. Oz, T. *et al.* Strength of Selection Pressure Is an Important Parameter  
742 Contributing to the Complexity of Antibiotic Resistance Evolution. *Mol. Biol.*  
743 *Evol.* **31**, 2387-2401 (2014).
- 744 53. Santos-Lopez, A., Marshall, C. W., Scribner, M. R., Snyder, D. J. & Cooper, V.  
745 S. Evolutionary pathways to antibiotic resistance are dependent upon

- 746 environmental structure and bacterial lifestyle. *Elife* **8**, 8-10 (2019).
- 747 54. Bolger, A. M., Lohse, M. & Usadel, B. Trimmomatic: A flexible trimmer for  
748 Illumina sequence data. *Bioinformatics* **30**, 2114-2120 (2014).
- 749 55. Barrick, J. E. *et al.* Identifying structural variation in haploid microbial  
750 genomes from short-read resequencing data using breseq. *BMC Genomics* **15**,  
751 1-17 (2014).
- 752 56. Deatherage, D. E. & Barrick, J. E. Identification of mutations in laboratory-  
753 evolved microbes from next-generation sequencing data using breseq. in  
754 *Methods in molecular biology (Clifton, N.J.)* **1151**, 165-188 (2014).
- 755 57. Regoes, R. R. *et al.* Pharmacodynamic Functions: a Multiparameter Approach  
756 to the Design of Antibiotic Treatment Regimens. *Antimicrob. Agents*  
757 *Chemother.* **48**, 3670-3676 (2004).
- 758 58. Bates, D., Mächler, M., Bolker, B. M. & Walker, S. C. Fitting Linear Mixed-  
759 Effects Models Using lme4. **67**, (2015).
- 760 59. Kuznetsova, A., Brockhoff, P. B. & Christensen, R. H. B. lmerTest Package:  
761 Tests in Linear Mixed Effects Models . *J. Stat. Softw.* **82**, (2017).
- 762 60. Oksanen, J. *et al.* vegan: Community Ecology Package. (2019).
- 763
- 764
